# Supplementary material for: A Facile Determination of Herbicide Residues and Its Application in On-Site Analysis
Source: MDPI journal article supplement (doi:10.3390/foods13081280), 2024-04-22
Supplement: s1 [file s1]

## Supplementary materials

### A facile determination of herbicide residues and its application in on-site analysis

Yifei Sun <sup>1, 2, 3</sup>, Yan Tang <sup>1, 3</sup>, Zetao Chen <sup>1, 3</sup>, Miaoxiu Ge <sup>1, 3</sup>, Wei Xiong <sup>1, 3, \*</sup> and Luhong Wen <sup>1, 3, \*</sup>

<sup>1</sup> The Research Institute of Advanced Technology, Ningbo University, Ningbo, 315211, P. R. China

<sup>2</sup> Faculty of Electrical Engineering and Computer Science, Ningbo University, Ningbo, 315211, P. R. China

<sup>3</sup> China Innovation Instrument Co., Ningbo, 315100, P. R. China

\* Correspondence: xiongwei@nbu.edu.cn (W. X.); wenluhong@nbu.edu.cn (L. W.)

**Table S1.** Preparation method for matrix-contained standard samples with different concentrations.

| Samples             | Added standard solution concentration (ppm) | Added standard solution volume (μL) | Matrix additive concentration (μg/kg) |
|---------------------|---------------------------------------------|-------------------------------------|---------------------------------------|
| Crushed rice (10 g) | 0.1                                         | 100                                 | 1                                     |
|                     | 1                                           | 20                                  | 2                                     |
|                     | 1                                           | 50                                  | 5                                     |
|                     | 1                                           | 100                                 | 10                                    |
|                     | 10                                          | 20                                  | 20                                    |
|                     | 10                                          | 30                                  | 30                                    |
|                     | 10                                          | 40                                  | 40                                    |
|                     | 10                                          | 50                                  | 50                                    |
|                     | 10                                          | 60                                  | 60                                    |
|                     | 10                                          | 80                                  | 80                                    |
|                     | 10                                          | 100                                 | 100                                   |

**Table S2.** Basic information (physicochemical properties and ions) about six herbicides.

| Compound     | Saturated vapor pressure   | Ion form  | Measured $m/z$ value | Quantitative ions $m/z$ |
|--------------|----------------------------|-----------|----------------------|-------------------------|
| prometryn    | $2 \times 10^{-6}$ mmHg    | $[M+H]^+$ | 242.2                | 200.1                   |
| molinate     | $3.1 \times 10^{-9}$ mmHg  | $[M+H]^+$ | 188.1                | 126.1                   |
| alachlor     | $2.2 \times 10^{-5}$ mm Hg | $[M+H]^+$ | 270.1                | 238.1                   |
| acetochlor   | $2.8 \times 10^{-5}$ mmHg  | $[M+H]^+$ | 270.1                | 224.1                   |
| pretilachlor | $5.2 \times 10^{-8}$ mmHg  | $[M+H]^+$ | 312.2                | 252.2                   |

|           |                           |           |       |       |
|-----------|---------------------------|-----------|-------|-------|
| butachlor | $2.0 \times 10^{-6}$ mmHg | $[M+H]^+$ | 312.2 | 238.2 |
|-----------|---------------------------|-----------|-------|-------|

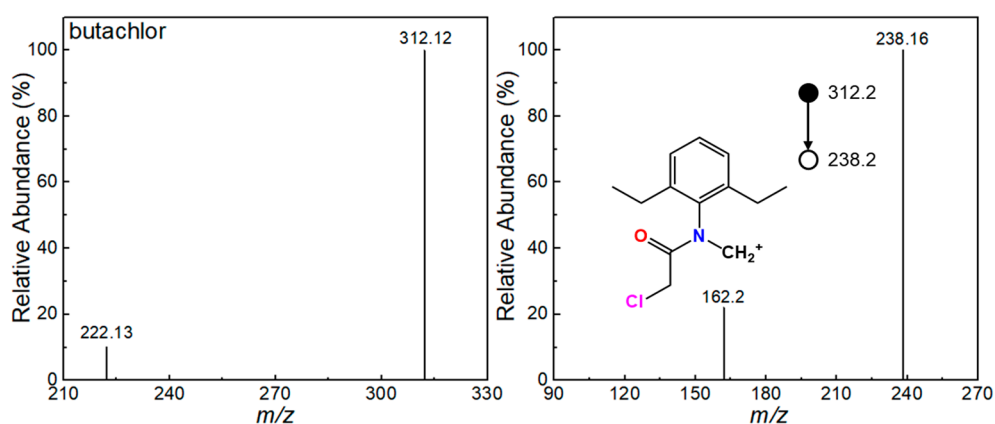

**Figure S1.** Mass spectra of molecular ions and fragmentation ions of pretilachlor.

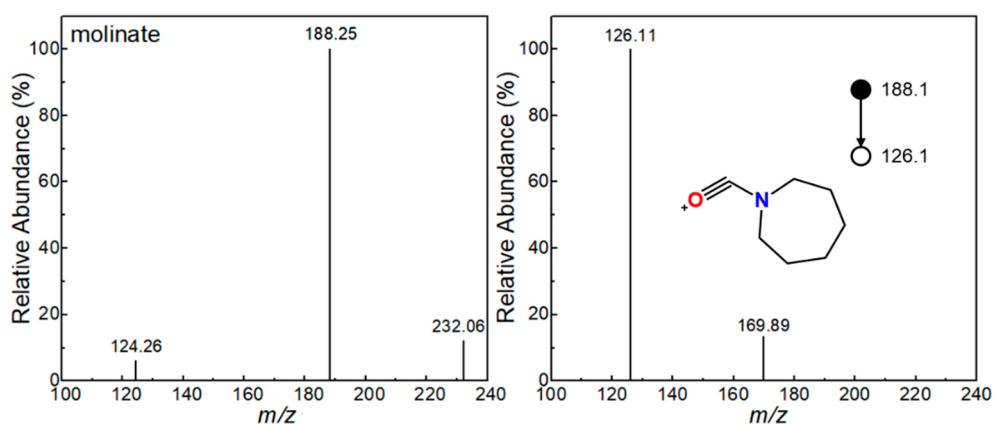

**Figure S2.** Mass spectra of molecular ions and fragmentation ions of molinate.

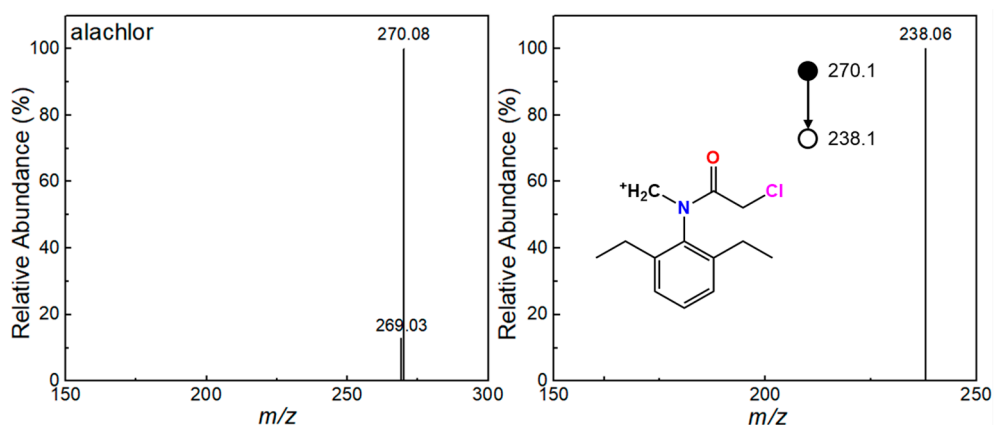

**Figure S3.** Mass spectra of molecular ions and fragmentation ions of alachlor.

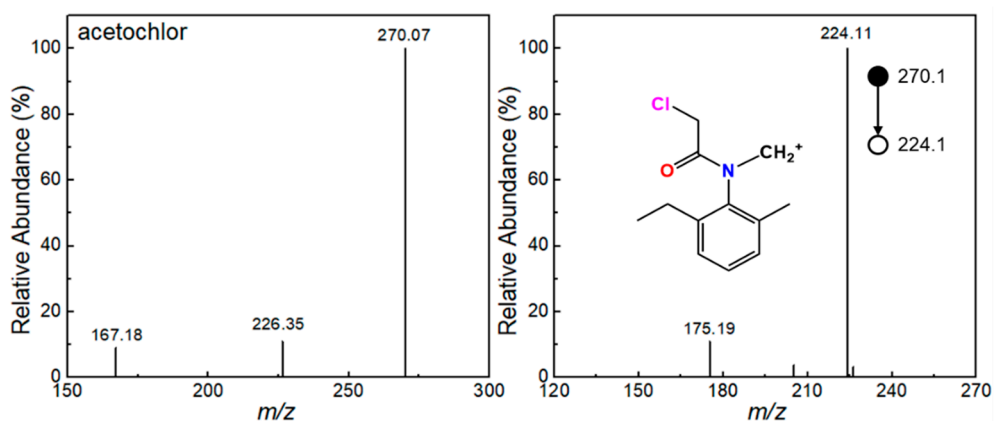

**Figure S4.** Mass spectra of molecular ions and fragmentation ions of acetochlor.

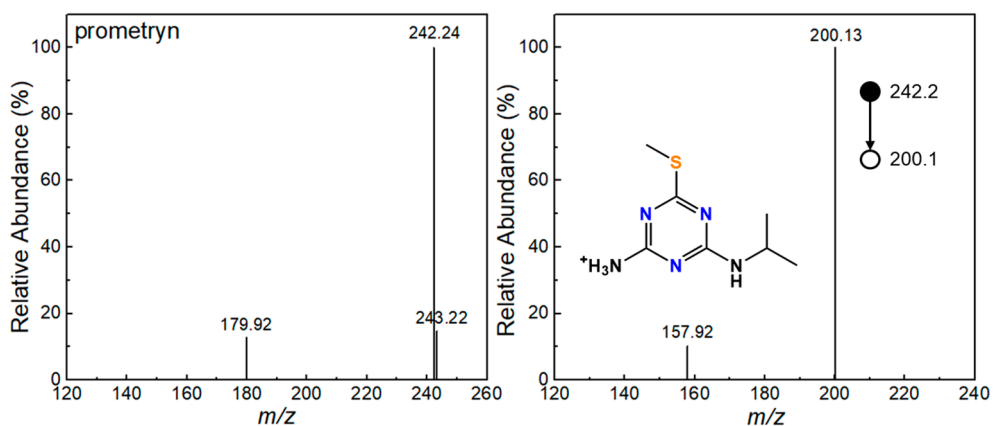

**Figure S5.** Mass spectra of molecular ions and fragmentation ions of prometryn.

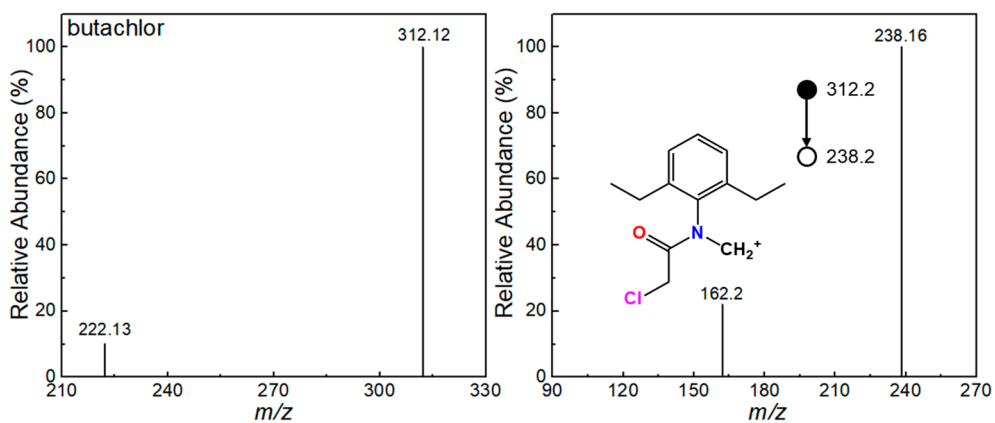

**Figure S6.** Mass spectra of molecular ions and fragmentation ions of butachlor.

**Table S3.** The linear range (L.R.), regression equations, linear correlation coefficients ( $R^2$ ), and limit of detection (LOD) of standard herbicides in the methanol.

| Analyte      | L.R. (ppb) | Regression equation     | $R^2$  | LOQ (ppb) | LOD (ppb) |
|--------------|------------|-------------------------|--------|-----------|-----------|
| prometryn    | 0.1-100    | $y = 5324.71x - 286.24$ | 0.9931 | 0.1       | 0.03      |
| molinate     | 5-100      | $y = 275.74x + 127.64$  | 0.9954 | 5         | 1.5       |
| alachlor     | 5-100      | $y = 33.28x + 36.09$    | 0.9915 | 5         | 1.5       |
| acetochlor   | 5-100      | $y = 55.95x + 356.88$   | 0.9856 | 5         | 1.5       |
| pretilachlor | 0.1-100    | $y = 5358.99x + 110.83$ | 0.9980 | 0.1       | 0.03      |
| butachlor    | 5-100      | $y = 38.13x + 61.84$    | 0.9964 | 5         | 1.5       |

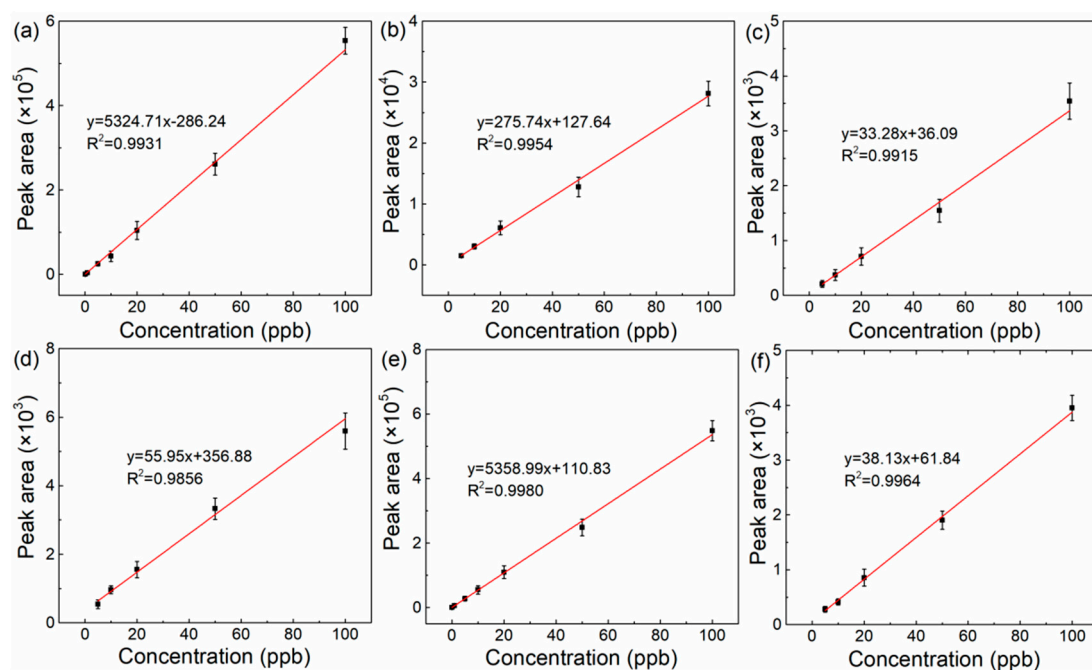

**Figure S7.** Standard calibration curves for six standard herbicides in methanol at various concentrations of 0.1-100 ppb: (a) prometryn, (b) molinate, (c) alachlor, (d) acetochlor, (e) pretilachlor and (f) butachlor.

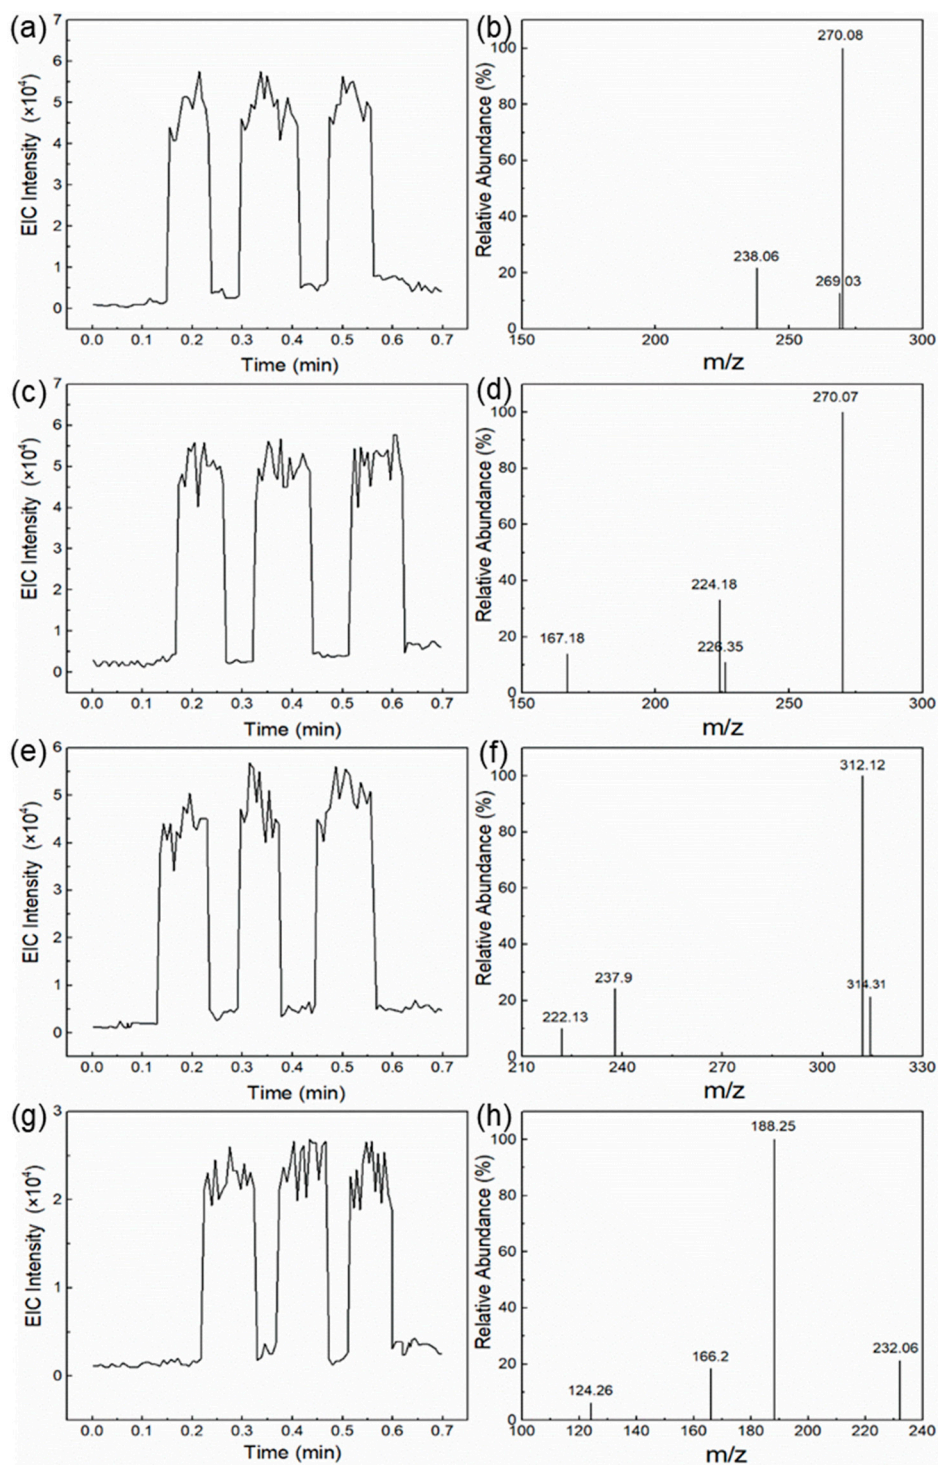

**Figure S8.** The EIC peaks for parent ions with three consecutive injections and corresponding mass spectra of (a, b) alachlor (500  $\mu\text{g/kg}$ ), (c, d) acetochlor (500  $\mu\text{g/kg}$ ), (e, f) butachlor (1000  $\mu\text{g/kg}$ ) and (g, h) molinate (500  $\mu\text{g/kg}$ ).

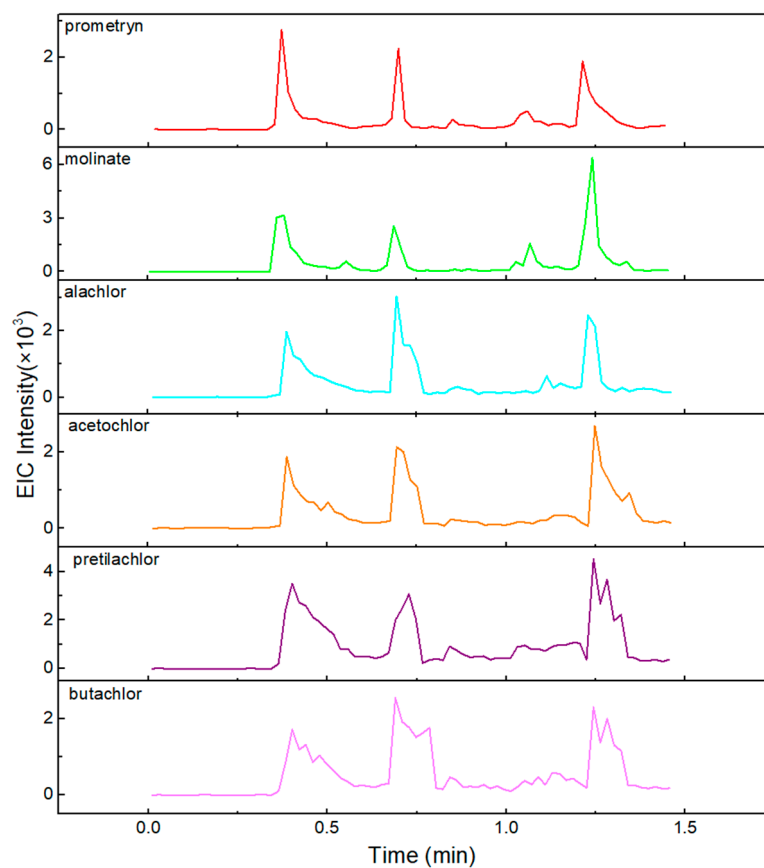

**Figure S9.** The EIC peaks of fragmentation ions for six herbicides with three consecutive injections.

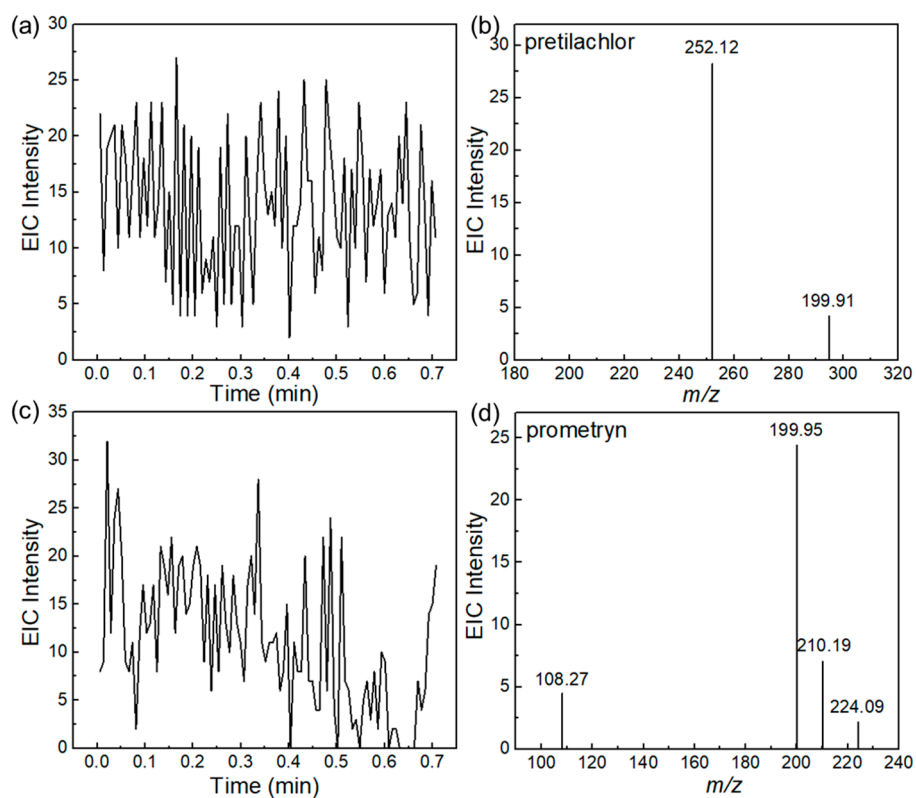

**Figure S10.** The EIC and mass spectra of a piece (length of 1 cm) of leaf from rice samples grown

naturally for two days after spraying with pretilachlor solution (1 ppm, 20  $\mu$ L) and prometryn solution (1 ppm, 20  $\mu$ L), which detected by the TD split-type DBDI ionized system without heating.

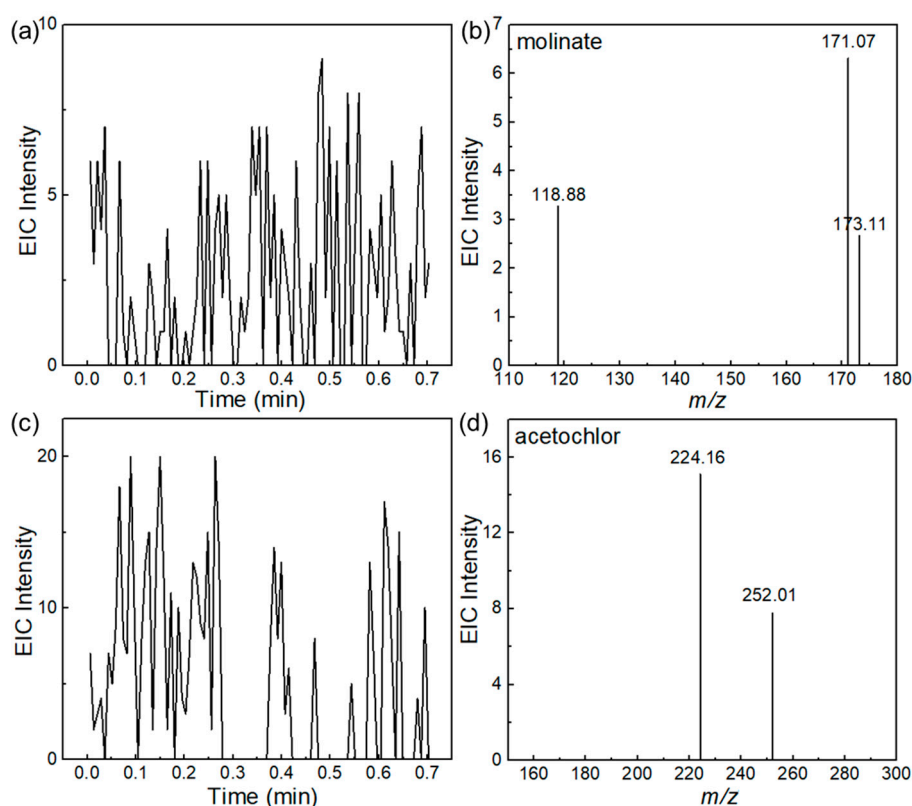

**Figure S11.** The EIC and mass spectra of a piece of leaf (length of 1 cm) from rice samples grown naturally for two days after spraying with molinate solution (1 ppm, 20  $\mu$ L) and acetochlor solution (1 ppm, 20  $\mu$ L), which detected by the TD split-type DBDI ionized system without heating.

**Table S4.** Analytical results of herbicides by on-site non-destructive analysis.

| Analyst      | L.R.<br>( $\mu$ g/kg) | Regression equation     | R <sup>2</sup> | LOD ( $\mu$ g/kg) | RSD   |
|--------------|-----------------------|-------------------------|----------------|-------------------|-------|
| pretilachlor | 5-100                 | $y = 365.452x + 17.647$ | 0.9975         | 1.5               | 15.2% |
| prometryn    | 10-100                | $y = 370.4x - 117.6$    | 0.9952         | 3                 | 17.2% |
| molinate     | 50-200                | $y = 70.7154x - 216.65$ | 0.9941         | 15                | 12.4% |
| acetochlor   | 60-200                | $y = 20.968x - 143.71$  | 0.9995         | 18                | 13.5% |
